# Supplementary material for: Instant and delayed effects of March biomass burning aerosols over the Indochina Peninsula
Source: Copernicus journal article supplement (doi:10.5194/acp-22-15425-2022), 2022-12-06
Supplement: Supplementary file 1 [file acp-22-15425-2022-supplement.pdf]

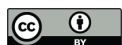

*Supplement of*

## **Instant and delayed effects of March biomass burning aerosols over the Indochina Peninsula**

**Anbao Zhu et al.**

*Correspondence to:* Haiming Xu ([hxu@nuist.edu.cn](mailto:hxu@nuist.edu.cn))

The copyright of individual parts of the supplement might differ from the article licence.

Table S1. Evaluation Statistics for AOD, precipitation and 850-hPa wind.

| Variable                                     | Mean Obs. | Mean Sim. | Mean Bias | Relative Mean Bias (%) | RMSE | Pattern Correlation |
|----------------------------------------------|-----------|-----------|-----------|------------------------|------|---------------------|
| AOD                                          | 0.44      | 0.33      | -0.11     | -25.63                 | 0.23 | 0.71                |
| Precipitation (mm day <sup>-1</sup> )        | 2.22      | 3.52      | 1.29      | 58.25                  | 2.67 | 0.71                |
| 850-hPa zonal wind (m s <sup>-1</sup> )      | -0.17     | -0.55     | -0.38     | 230.5                  | 1.8  | 0.94                |
| 850-hPa meridional wind (m s <sup>-1</sup> ) | 0.44      | 0.30      | 0.14      | -30.85                 | 1.53 | 0.67                |

RMSE: Root mean square error.

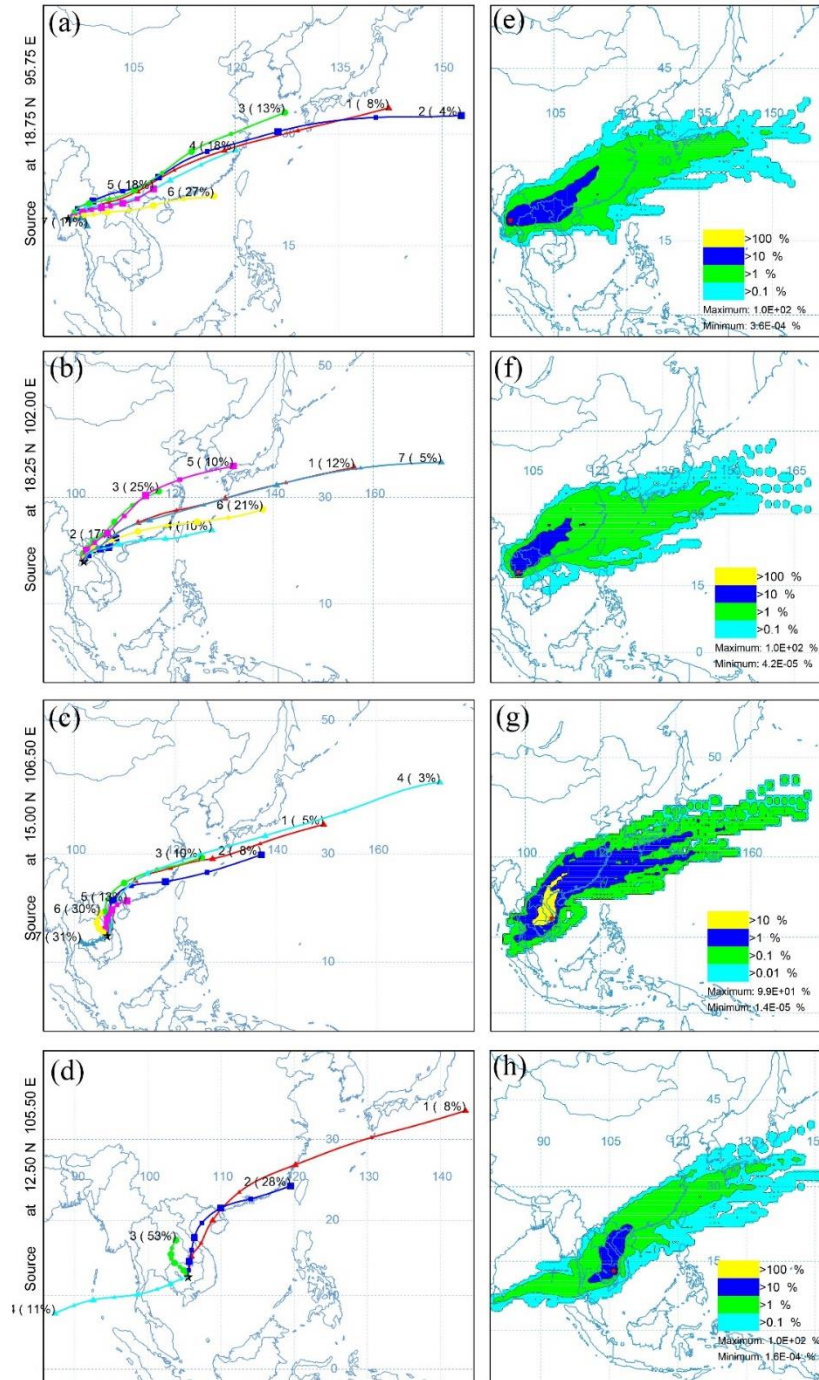

**Figure S1: Distribution of cluster mean 96h (4 days) forward trajectories (a–d, left column) of air mass and their frequencies (e–h, right column) based on the Hybrid Single-Particle Lagrangian Integrated Trajectory (HYSPPLIT) model for north-western Indochina Peninsula (a, e; 95.75°E, 18.75°N), northern Indochina Peninsula (b, f; 102°E, 18.25°N), mid-eastern Indochina Peninsula (c, g; 106.5°E, 15°N), and southern Indochina Peninsula (d, h; 105.5°E, 12.5°N) from March 1<sup>st</sup> to April 20<sup>th</sup>, 2010. The 1-degree meteorological data from the Global Data Assimilation System (GDAS1) was used to run the model. Note that we did the trajectory analysis only for March, since the results were quite similar to those for March 1<sup>st</sup>–April 20<sup>th</sup>.**

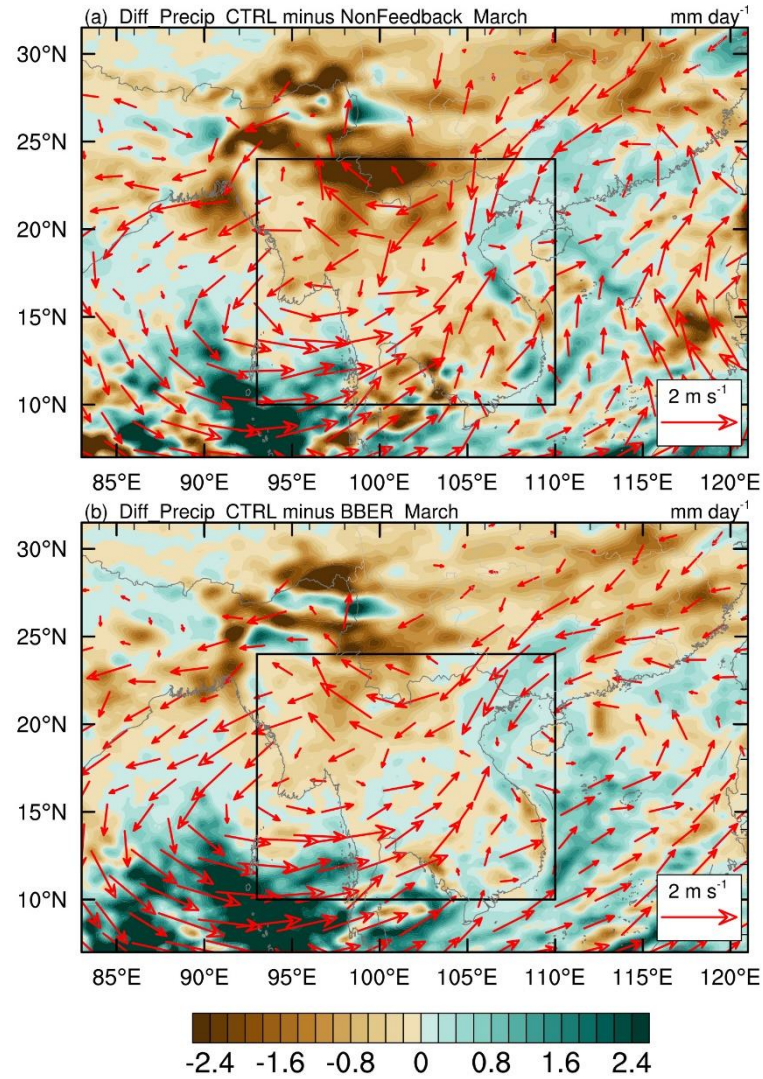

**Figure S2: Comparison of model simulations with different model settings. (a) The differences in precipitation (shading; mm day<sup>-1</sup>) and 850-hPa wind (vector; m s<sup>-1</sup>) between CTRL and Non-Feedback (i.e., CTRL minus Non-Feedback) during March of 2010. (b) Same as (a), but for the differences between CTRL and BBER (i.e., CTRL minus BBER). Note that both CTRL and BBER runs here contain only one member of the ensemble runs, which started on February 25<sup>th</sup> 2010.**



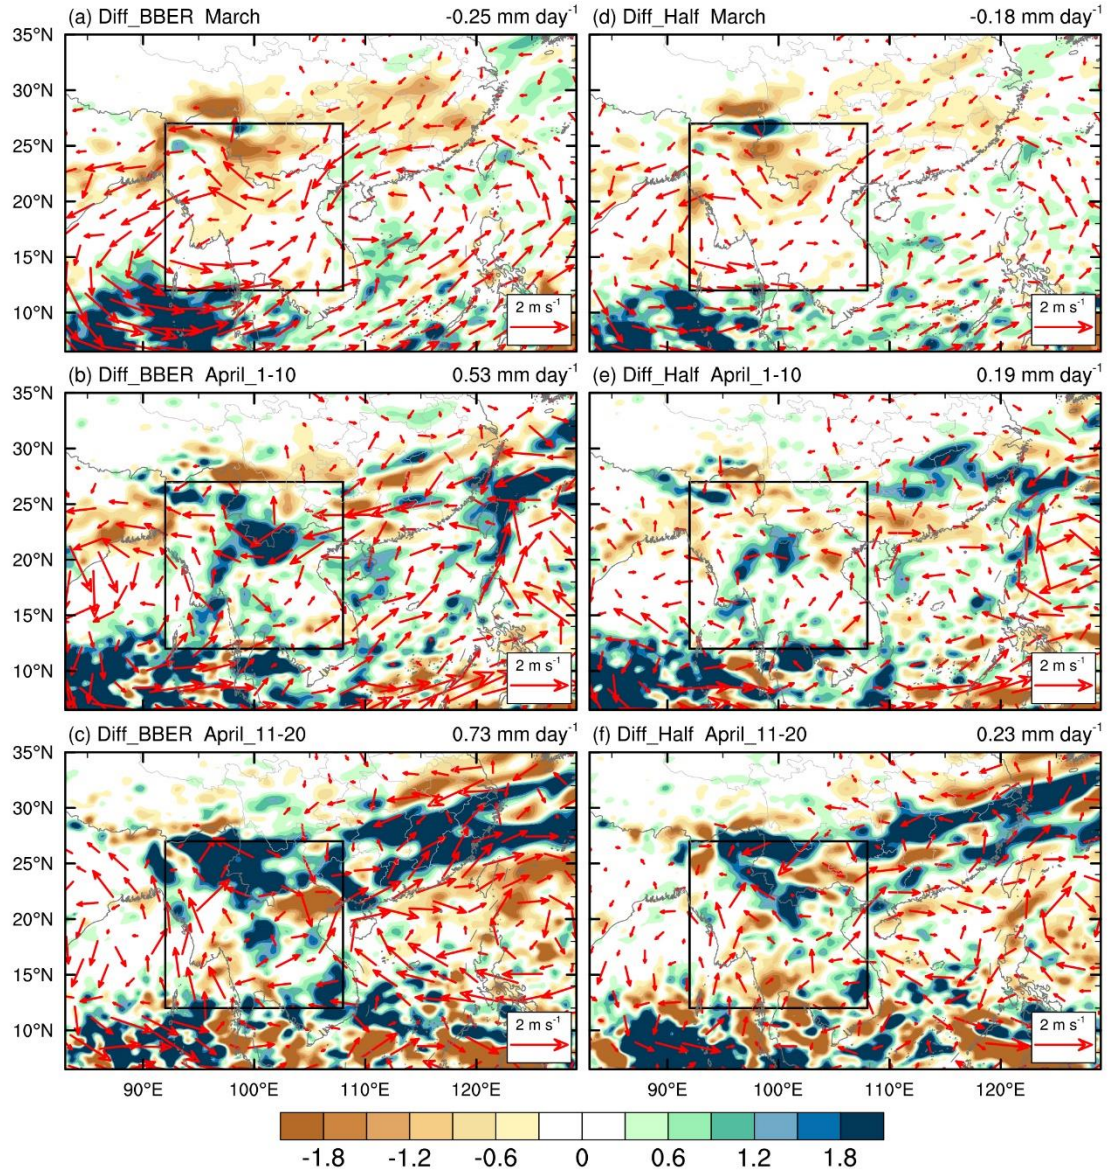

**Figure S3: Comparison of model simulations with different BB emission reduction scenarios. (a–c) The differences in precipitation (shading;  $\text{mm day}^{-1}$ ) and 850-hPa wind (vector;  $\text{m s}^{-1}$ ) between CTRL and BBER (i.e., CTRL minus BBER) during (a) March, (b) early-April and (c) mid-April of 2010. (d–f) Same as (a–c), but for the differences between CTRL and Half (i.e., CTRL minus Half). The black box outlines the main region of precipitation anomalies in the ICP (92°E–108°E, 12°N–27°N), and the regional mean is given at the top-left corner of each panel. Note that the CTRL and BBER runs here have only one member of the ensemble runs, which started on February 25<sup>th</sup> 2010.**
